# Supplementary material for: Differences in Stress and Anxiety Among Women With and Without Children in the Household During the Early Months of the COVID-19 Pandemic
Source: Front Public Health. 2021 Sep 1;9:688462. doi: 10.3389/fpubh.2021.688462 (PMC8440851; doi:10.3389/fpubh.2021.688462)
Supplement: Supplementary file 1 [file Table_1.DOCX]

*Supplementary table 1*. Results of echocardiography before (T0) and at the end of the cycle (T1) with AAS, and after the recovery period (T2). Mixed models were used for trend analysis. The mean is shown with 95%-confidence interval (CI). †P=.01 to .05, ‡P<0.01.

|  | **T0 (n=31) x̄ [CI]** | **T1 (n=31) x̄ [CI]** | **T2 (n=25) x̄ [CI]** |
| --- | --- | --- | --- |
| **Basic parameters** |  |  |  |
| Heart rate  (/min) | 59.3 (n=31) [56.2 to 62.4] | 69.3‡ (n=31) [66.2 to 72.4] | 61.6 (n=25) [0.3 to 1.6] |
| Systolic blood pressure  (mmHg) | 130 (n=31) [126 to 134] | 136† (n=31) [132 to 140] | 127 (n=25) [122 to 132] |
| Diastolic blood pressure (mmHg) | 81 (n=31) [77 to 85] | 86† (n=31) [82 to 89] | 79 (n=25) [75 to 83] |
| Body surface area  (BSA, m2) | 2.15 (n=31)  [2.09 to 2.21] | 2.21† (n=31) [2.25 to 2.26] | 2.11 (n=25) [2.05 to 2.18] |
|  | | | |
| **Left ventricle** |  |  |  |
| Left ventricular end-diastolic dimension (LVEDd, mm) | 52.8 (n=31) [51.0 to 54.7] | 53.6 (n=30) [51.8 to 55.5] | 53.4 (n=25) [51.4 to 55.5] |
| Left ventricular end-systolic dimension (LVEDs, mm) | 35.0 (n=31) [33.4 to 36.6] | 34.9 (n=30) [33.3 to 36.5] | 36.6 (n=25) [34.8 to 38.4] |
| Left ventricular end-diastolic  volume 3D (3D LVEDV, ml) | 184.1 (n=26) [172.5 to 195.7] | 194.5† (n=28) [183.0 to 205.9] | 167.3‡ (n=18) [155.4 to 179.1] |
| Left ventricular end-systolic  volume 3D (3D LVESV, ml) | 74.4 (n=25) [67.2 to 81.6] | 85.9‡ (n=28) [78.8 to 93.0] | 66.4‡ (n=17) [59.1 to 73.8] |
| Intraventricular end-diastolic  septal thickness (IVSd, mm) | 8.21 (n=31) [7.81 to 8.62] | 9.08‡ (n=31) [8.68 to 9.49] | 8.51 (n=25) [8.07 to 8.95] |
| Left ventricular end-diastolic posterior wall thickness (LVPWD, mm) | 8.18 (n=31) [7.75 to 8.60] | 9.36‡ (n=31) [8.94 to 9.78] | 8.45 (n=25) [8.00 to 8.91] |
| Left ventricular mass  (LV mass, g) | 161.5 (n=31) [146.4 to 176.5] | 189.8‡ (n=30) [174.6 to 205.0] | 165.8 (n=25) [149.7 to 181.9] |
| Left ventricular ejection fraction 3D (3D LVEF, %) | 61.1 (n=26) [58.8 to 63.4] | 56.2‡ (n=28) [54.0 to 58.5] | 60.8 (n=24) [58.4 to 63.2] |
| Global left ventricular strain  (LV strain global, %) | -18.9 (n=25) [-20.2 to -18.0] | -18.0 (n=22) [-19.1 to -16.9] | -19.1 (n=21) [-20.2 to -18.0] |
| Myocardial performance index  (MPI, Tei-index) | 0.34 (n=27) [0.29 to 0.40] | 0.42 (n=22) [0.35 to 0.48] | 0.36 (n=21) [0.30 to 0.42] |
|  |  |  |  |
| **Diastolic function** |  |  |  |
| Mitral valve E wave  (E, cm/s) | 73.4 (n=30) [67.7 to 79.0] | 69.2 (n=29) [63.4 to 74.9] | 72.0 (n=25) [65.9 to 78.1] |
| Mitral valve E wave duration time (E-DT, ms) | 209 (n=29) [193 to 225] | 204 (n=29) [189 to 221] | 215 (n=25) [198 to 233] |
| Mitral valve A wave  (A, cm/s) | 44.4 (n=30) [39.3 to 49.4] | 54.5‡ (n=29) [48.3 to 58.7] | 43.9 (n=25) [38.4 to 49.4] |
| Mitral valve A wave duration time (A-DT, ms) | 151 (n=30) [142 to 161] | 144 (n=28) [134 to 153] | 151 (n=25) [141 to 161] |
| E/A-ratio | 1.80 (n=31) [1.59 to 2.01] | 1.35‡ (n=22) [1.14 to 1.56] | 1.78 (n=25) [1.56 to 2.01] |
| Lateral e’ wave  (e’ lat, cm/s) | 15.1 (n=31) [13.7 to 16.5] | 13.3† (n=31) [11.9 to 14.6] | 14.2 (n=25) [12.7 to 15.7] |
| Septal e’ wave  (e’ sept, cm/s) | 10.6 (n=31) [9.8 to 11.5] | 9.6 (n=30) [8.8 to 10.5] | 10.2 (n=25) [9.2 to 11.1] |
| Lateral E/e’-ratio  (E/e’ lat) | 4.9 (n=30) [4.2 to 5.7] | 5.5 (n=29) [4.8 to 6.3] | 5.9 (n=25) [5.1 to 6.7] |
| Septal E/e’-ratio  (E/e’ sept) | 7.2 (n=30) [6.5 to 7.9] | 7.6 (n=28) [6.9 to 8.3] | 7.2 (n=25) [6.5 to 8.0] |
| Pulmonary vein Arev  (PV Arev, cm/s) | 33.8 (n=25) [26.8 to 40.9] | 30.5 (n=28) [23.8 to 37.1] | 32.0 (n=23) [24.6 to 39.4] |
| Pulmonary vein Arev duration time (PV Arev DT, ms) | 107 (n=26) [97 to 117] | 114 (n=28) [104 to 123] | 116 (n=23) [105 to 127] |
| Pulmonary vein D  (PVD, cm/s) | 54.4 (n=26) [50.0 to 58.8] | 53.6 (n=30) [49.5 to 57.8] | 51.2 (n=23) [46.4 to 55.9] |
| Pulmonary vein S  (PVS, cm/s) | 49.0 (n=26) [44.7 to 53.3] | 51.8 (n=30) [47.8 to 55.9] | 45.8 (n=23) [41.2 to 50.4] |
| Left atrial volume 3D  (3D LAvol, ml) | 62.1 (n=25) [56.6 to 67.5] | 71.2‡ (n=27) [65.9 to 76.5] | 63.5 (n=23) [57.8 to 69.3] |
|  | | | |
| **Right ventricle** |  |  |  |
| Tricuspid annular plane systolic excursion (RV TAPSE, mm) | 24.6 (n=24) [23.2 to 26.1] | 23.2 (n=27) [21.8 to 24.6] | 24.3 (n=24) [22.9 to 25.7] |
| Right ventricular tissue Doppler imaging (RV TDI, cm/s) | 13.4 (n=22) [12.6 to 14.2] | 13.1 (n=25) [12.4 to 13.9] | 13.4 (n=25) [12.6 to 14.1] |
| Right ventricular annulus diastolic (RV annulus, mm) | 38.1 (n=30) [36.2 to 40.0] | 38.9 (n=29) [37.0 to 40.8] | 38.4 (n=24) [36.3 to 40.4] |
| Right ventricular fractional area change (RVFAC, %) | 49.2 (n=30) [45.6 to 52.9] | 48.1 (n=30) [44.5 to 51.8] | 50.7 (n=25) [46.7 to 54.8] |
| Pulmonary artery acceleration slope (PA acc slope, cm/s2) | 671 (n=25) [534 to 808] | 772 (n=27) [638 to 906] | 674 (n=24) [532 to 817] |
| Pulmonary artery acceleration time (PAAT, ms) | 160 (n=25) [146 to 174] | 143 (n=27) [129 to 157] | 158 (n=24) [143 to 173] |
| Right ventricular outflow tract  (RVOT, mm) | 34.0 (n=30) [32.1 to 35.9] | 34.8 (n=28) [32.9 to 36.8] | 33.6 (n=24) [31.5 to 35.6] |
| Right ventriculo-arterial coupling (RVAC) | 49.3 (n=27) [45.4 to 53.1] | 47.9 (n=29) [44.2 to 51.6] | 50.4 (n=23) [46.2 to 54.6] |
